# Supplementary material
Source: PubMed Central journal article supplement (PMC6812633)
Supplement: NIHMS1539205-supplement-125_2019_4984_MOESM1_ESM.pdf [file NIHMS1539205-supplement-125_2019_4984_MOESM1_ESM.pdf]

# **Electronic Supplementary Material**

## **Phenotypic alterations in pancreatic lymph node stromal cells from human donors with type 1 diabetes and NOD mice**

Jorge Postigo-Fernandez, Donna L. Farber, and Rémi J. Creusot

| TYPE | SOURCE | REFERENCE | GENDER | ETHNICITY | AGE | AUTOANTIBODIES               | DIABETES DURATION |
|------|--------|-----------|--------|-----------|-----|------------------------------|-------------------|
| CTRL | NPOD   | 6413      | F      | WHITE     | 10  |                              |                   |
| CTRL | LIVENY | 201       | F      | WHITE     | 23  |                              |                   |
| CTRL | NPOD   | 6331      | F      | AFA       | 27  |                              |                   |
| CTRL | LIVENY |           | F      | UNK.      | 32  |                              |                   |
| CTRL | LIVENY |           | F      | UNK.      | 39  |                              |                   |
| CTRL | LIVENY |           | F      | UNK.      | 45  |                              |                   |
| CTRL | LIVENY | 311       | F      | WHITE     | 52  |                              |                   |
| CTRL | LIVENY | 298       | F      | WHITE     | 59  |                              |                   |
| CTRL | LIVENY |           | F      | AFA       | 70  |                              |                   |
| CTRL | LIVENY |           | F      | WHITE     | 73  |                              |                   |
| CTRL | NPOD   | 6412      | F      | WHITE     | 17  |                              |                   |
| CTRL | NPOD   | 6420      | M      | WHITE     | 11  |                              |                   |
| CTRL | NPOD   | 6431      | M      | WHITE     | 13  |                              |                   |
| CTRL | LIVENY |           | M      | WHITE     | 18  |                              |                   |
| CTRL | LIVENY |           | M      | WHITE     | 21  |                              |                   |
| CTRL | LIVENY |           | M      | ASIAN     | 23  |                              |                   |
| CTRL | LIVENY |           | M      | AFA       | 24  |                              |                   |
| CTRL | NPOD   | 6454      | M      | WHITE     | 25  |                              |                   |
| CTRL | NPOD   | 6439      | M      | AFA       | 26  |                              |                   |
| CTRL | LIVENY | 346       | M      | WHITE     | 32  |                              |                   |
| CTRL | LIVENY | 260       | M      | HISP.     | 34  |                              |                   |
| CTRL | LIVENY |           | M      | WHITE     | 35  |                              |                   |
| CTRL | LIVENY |           | M      | UNK.      | 40  |                              |                   |
| CTRL | LIVENY | 259       | M      | AFA       | 46  |                              |                   |
| CTRL | LIVENY |           | M      | UNK.      | 49  |                              |                   |
| CTRL | LIVENY | 206       | M      | WHITE     | 50  |                              |                   |
| CTRL | LIVENY | 480       | M      | WHITE     | 55  |                              |                   |
| CTRL | LIVENY | 363       | M      | WHITE     | 65  |                              |                   |
| CTRL | LIVENY | 257       | M      | WHITE     | 69  |                              |                   |
| CTRL | NPOD   | 6428      | M      | AFA       | 6   |                              |                   |
| T1D  | NPOD   | 6457      | F      | WHITE     | 9   | mIAA+                        | 3 years           |
| T1D  | NPOD   | 6380      | F      | AFA       | 11  | -                            | < 1 year          |
| T1D  | NPOD   | 6371      | F      | WHITE     | 12  | GADA+, IA-2A+, mIAA+, ZnT8A+ | 2years            |
| T1D  | NPOD   | 6432      | F      | AFA       | 16  | GADA+ IA-2A+ mIAA+           | ≥10 years         |
| T1D  | NPOD   | 6456      | F      | AFA       | 30  | GADA+ ZNT8+                  | < 1 year          |
| T1D  | NPOD   | 6459      | F      | WHITE     | 20  | IA2+,IAA+ ZNT+               | ≥10 years         |
| T1D  | NPOD   | 6458      | F      | AFA       | 13  | GADA+                        | 6 years           |
| T1D  | NPOD   | 6422      | M      | WHITE     | 22  | mIAA+                        | ≥10 years         |
| T1D  | NPOD   | 6414      | M      | AFA       | 23  | GADA+ mIAA+ ZnT8+            | < 1year           |
| T1D  | NPOD   | 6449      | M      | WHITE     | 24  | IA2+,IAA+ ZNT+               | 2 years           |
| T1D  | NPOD   | 6441      | M      | WHITE     | 29  | IA2A+ GADA+                  | 5years            |
| T1D  | NPOD   | 6327      | M      | HISP.     | 71  | mIAA+                        | ≥10 years         |
| AAb  | NPOD   | 6397      | F      | WHITE     | 21  | GADA+                        | -                 |
| AAb  | NPOD   | 6450      | F      | WHITE     | 22  | GADA+ ZNT8+                  | -                 |
| AAb  | NPOD   | 6424      | M      | WHITE     | 17  | GADA+ IAA+                   | -                 |
| AAb  | NPOD   | 6433      | M      | HISP.     | 23  | GADA+                        | -                 |

**ESM Table 1: List of human donors used for this study.** Legend: CTRL (no T1D); AAb (autoantibody positive, not T1D-diagnosed); T1D (type 1 diabetes-diagnosed); LIVENY (LiveOnNY); F (women); M (men); WHITE (European descendant); AFA (African-American); HISP. (Hispanic); UNK. (unknown). Donors from nPOD and LiveOnNY were similarly conditioned, and although LiveOnNY samples were typically fresher than nPOD samples by up to one day, direct comparison of control samples from nPOD vs. LiveOnNY returned no significant differences, suggesting that source and timing were not confounding factors. Furthermore, if only nPOD samples were used, the differences between controls and T1D remained unaffected (with differences in relative FRC frequency or HLA-DR expression, for example, remaining significant).

| Reactivity | Protein                               | Clone   | Conjugate | Source      | RRID        | Dilution                  |
|------------|---------------------------------------|---------|-----------|-------------|-------------|---------------------------|
| human      | CD45                                  | HI30    | BV510     | Biolegend   | AB_2561940  | 1/400                     |
| human      | HLA-DR                                | L243    | AF700     | Biolegend   | AB_493771   | 1/400                     |
| human      | PDPN                                  | NC-08   | PE        | Biolegend   | AB_1595457  | 1/300                     |
| human      | CD31                                  | WM59    | APC/Cy7   | Biolegend   | AB_10640734 | 1/300                     |
| human      | HLA-A,B,C                             | W6/32   | APC       | Biolegend   | AB_314879   | 1/400                     |
| human      | PD-L1                                 | 29E.2A3 | BV421     | Biolegend   | AB_2563852  | 1/300                     |
| human      | CD3                                   | HIT3a   | Biotin    | Biolegend   | AB_314040   | 1ul/10 <sup>7</sup> cells |
| human      | CD3                                   | HIT3a   | FITC      | Biolegend   | AB_314042   | 1/200                     |
| human      | CD19                                  | HIB19   | Biotin    | Biolegend   | AB_314234   | 1ul/10 <sup>7</sup> cells |
| human      | CD20                                  | 2H7     | FITC      | Biolegend   | AB_493227   | 1/200                     |
| human      | CD235a                                | HIR2    | Biotin    | eBioscience | AB_494036   | 1ul/10 <sup>7</sup> cells |
| human      | CD235a                                | HI264   | FITC      | Biolegend   | AB_10613463 | 1/200                     |
| mouse      | CD45                                  | 30-F11  | APC/Cy7   | Biolegend   | AB_312981   | 1/400                     |
| mouse      | CD45                                  | 30-F11  | Biotin    | Biolegend   | AB_312981   | 1ul/10 <sup>7</sup> cells |
| mouse      | I-A <sup>K</sup> (I-A <sup>B7</sup> ) | 10-3.6  | PE        | Biolegend   | AB_313457   | 1/400                     |
| mouse      | H2-K <sup>d</sup>                     | SF1-1.1 | BV421     | Biolegend   | AB_2565656  | 1/400                     |
| mouse      | PDPN                                  | 8.1.1   | PE/Cy7    | Biolegend   | AB_10613648 | 1/300                     |
| mouse      | CD31                                  | 390     | FITC      | Biolegend   | AB_312901   | 1/400                     |
| mouse      | PD-L1                                 | 10F.9G2 | APC       | Biolegend   | AB_10612741 | 1/200                     |
| mouse      | TER-119                               | TER-119 | Biotin    | Biolegend   | AB_313705   | 1ul/10 <sup>7</sup> cells |

**ESM Table 2: List of antibodies used for this study.** Note that the anti-I-A<sup>K</sup> antibody is used to stain I-A<sup>B7</sup> (cross-reactive).

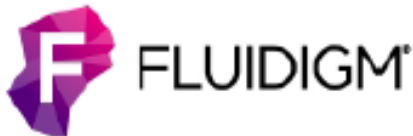

|         |                   |                 |              |
|---------|-------------------|-----------------|--------------|
| JOB ID: | 5680_FDGP_15.D1.1 | TARGET SPECIES: | Homo sapiens |
|---------|-------------------|-----------------|--------------|

Results Explanation:

- I) Assay performance was evaluated via serial dilution of a commercial reference sample.
- II) The  $\Delta CT$  (or  $C_q$ ) was calculated for all pairwise combinations of assays in this request and the slope of  $\Delta CT$  versus  $\log_2$  template dilution calculated and averaged.
- III) The mean slope of  $\Delta CT$  versus template concentration for cDNA templates indicates relative error in measuring 2-fold changes for the given assay compared to the other assays in this request. If two assays have equal efficiencies and there is no measurement error, the slope will be zero. Typically, 95% of assays fall in the range -0.1 to 0.1.
- IV) NO CALL indicates assays that generated < 3 serial dilution measurements or which typically indicates gene expression too low to be reliably measured in the commercial reference sample.

Reference: Livak KJ, Schmittgen TD. Methods 2001; 25:402-408.

| Assay Name (ID)   | $\Delta CT$ Slope | Assay Name (ID)   | $\Delta CT$ Slope |
|-------------------|-------------------|-------------------|-------------------|
| ACTB_55733_i2     | .034              | AIRE_61200_i5     | .419              |
| ALDH1A1_3993_i5   | .064              | AMBP_26385_i0     | .029              |
| ARG1_59789_i2     | .044              | ARG2_24820_i2     | .043              |
| CD274_69683_i0    | .020              | CELA1_24767_i4    | -.223             |
| CHGA_24827_i1     | -.009             | DEAF1_69684_i10   | .050              |
| EBI3_20989_i3     | .061              | ENTPD1_26447_i7   | .054              |
| FAS_55622_i0      | -.030             | FASLG_69305_i2    | -.032             |
| FEZF2_56986_i2    | -.120             | G6PC2_69686_i1    | No Call           |
| GAD2_31524_i2     | No Call           | GAPDH_55153_i3    | .026              |
| GUSB_55154_i0     | .050              | HMOX1_6488_i2     | .042              |
| HPRT1_5093_i5     | -.029             | IAPP_61870_i1     | -.048             |
| ICA1_28321_i8     | .016              | ICOSLG_13662_i3   | .015              |
| IDO1_26352_i6     | -.049             | IL10_12369_i3     | -.003             |
| IL12A_13006_i2    | .063              | IL1RN_6616_i2     | .016              |
| IL27_20856_i2     | .040              | INS_62411_e1      | -.026             |
| LGALS1_59844_i1   | .042              | LGALS9_27386_i1   | -.043             |
| LILRB2_61262_i4   | .036              | LILRB4_62868_i2   | .018              |
| MLANA_56562_i2    | .011              | NOS2_12347_i17    | -.081             |
| NT5E_56640_i0     | .003              | PDCD1LG2_23699_i1 | -.020             |
| PTPRN_69685_i20   | -.032             | SAG_29669_i4      | No Call           |
| SEMA4A_29244_i9   | -.156             | SLC30A8_26364_i3  | -.041             |
| TGFB1_7272_i1     | .013              | TNFAIP3_25385_i1  | .036              |
| TNFRSF14_24384_i6 | -.066             | TSLP_67805_i2     | .009              |
| TYR_60959_i0      | No Call           | VTCN1_60960_i3    | -.111             |

**ESM Table 3: Assay performance results of all assays used on Biomark 48x48 IFC. Validation report provided by Fluidigm.**

| Gene     | Protein           | Description and rationale for testing                                                                                  |
|----------|-------------------|------------------------------------------------------------------------------------------------------------------------|
| AIRE     | AIRE              | Autoimmune regulator, controls expression of TSAs in mTECs                                                             |
| DEAF1    | DEAF1             | Deformed autoregulatory factor 1, controls expression of TSAs in LNs                                                   |
| FEZF2    | FEZF2             | FEZ family zinc finger 2, controls expression of TSAs in mTECs                                                         |
| INS      | Insulin           | Insulin, targeted by T cells and antibodies in mouse and human T1D                                                     |
| GAD2     | GAD65             | Glutamic acid decarboxylase, targeted by T cells and antibodies in mouse and human T1D                                 |
| PTPRN    | IA-2              | Insulinoma antigen 2, targeted by T cells in mouse and human T1D                                                       |
| G6PC2    | IGRP              | Islet-specific glucose-6-phosphatase catalytic subunit-related protein, targeted by T cells in mouse and human T1D     |
| CHGA     | CHGA              | Chromogranin A, targeted by T cells in mouse and human T1D                                                             |
| SLC30A8  | ZNT8              | Zinc transporter member 8, targeted by T cells and antibodies in mouse and human T1D                                   |
| ICA1     | ICA1              | Islet cell autoantigen 1, targeted by T cells in mouse and human T1D                                                   |
| IAPP     | IAPP              | Islet amyloid polypeptide, targeted by T cells in mouse and human T1D                                                  |
| CELA1    | CELA1             | Chymotrypsin-like elastase family member 1, exocrine pancreas TSA                                                      |
| AMBP     | AMBP              | Alpha-1-microglobulin/bikunin precursor, liver TSA                                                                     |
| SAG      | Arrestin          | S-antigen / arrestin, eye TSA                                                                                          |
| TYR      | Tyrosinase        | Tyrosinase, skin TSA, LEC-specific in mice                                                                             |
| MLANA    | MART1             | Melanoma antigen recognized by T-cells 1, melanocyte TSA                                                               |
| TGFB1    | TGF-b1            | Immunosuppressive cytokine, induces Foxp3 expression in Tregs                                                          |
| IL10     | IL-10             | Immunosuppressive cytokine, induces IL-10-producing Tregs                                                              |
| IL27     | IL-27a            | Immune regulatory when combined with EB13 (IL-27), induces IL-10 in T cells and CD39 in DCs                            |
| IL12A    | IL-12p35/IL-35a   | Immune regulatory when combined with EB13 (IL-35), induces IL-35-producing Tregs                                       |
| EBI3     | EBI3              | Immune regulatory when combined with IL-27a or IL-12p35                                                                |
| IL1RN    | IL-1RA            | Anti-inflammatory decoy receptor for IL-1                                                                              |
| LGALS1   | Galectin-1        | Immunosuppressive and anti-proliferative in mice, protective in diabetes (in mice)                                     |
| LGALS9   | Galectin-9        | Immunosuppressive for pathogenic Th1 cells, binds Tim3                                                                 |
| TSLP     | TSLP              | Involved with the non-inflammatory maturation of mTECs in the thymus                                                   |
| ENTPD1   | CD39              | Participates in adenosine production from ATP, promotes Tregs                                                          |
| NT5E     | CD73              | Participates in adenosine production from ATP, promotes Tregs                                                          |
| CD274    | PD-L1/B7-H1       | Promotes deletion of activated T cells and supports Treg induction                                                     |
| PDCD1LG2 | PD-L2/CD273/B7-DC | Inducible; negatively regulates T cell immune responses.                                                               |
| SMA4A    | Semaphorin 4A     | Boost Treg function, binds Nrp1                                                                                        |
| VTCN1    | B7-H4             | Contributes to tolerance and Treg induction, protective in diabetes (in mice)                                          |
| ICOSLG   | ICOS-L            | Amplifies induction of IL-10 in T cells                                                                                |
| TNFRSF14 | HVEM/CD270        | Herpes virus entry mediator, promote Foxp3 expression in T cells.                                                      |
| LILRB4   | ILT3              | Inhibitory receptor on APCs                                                                                            |
| LILRB2   | ILT4              | Inhibitory receptor on APCs                                                                                            |
| FAS      | FAS               | Promotes deletion of activated T cells                                                                                 |
| FASLG    | FASL              | Promotes deletion of activated T cells                                                                                 |
| IDO1     | IDO1              | Indoleamine 2,3-dioxygenase, depletes tryptophan levels, contributes to tolerance and Treg induction                   |
| ALDH1A1  | ALDH1A1           | Aldehyde dehydrogenase 1, rate-limiting enzyme in the production of retinoic acid, which contributes to Treg induction |
| ARG1     | ARG1              | Arginase 1, depletes arginine levels, contributes to tolerance                                                         |
| ARG2     | ARG2              | Arginase 2, depletes arginine levels, contributes to tolerance                                                         |
| NOS2     | iNOS              | Nitric oxide synthase 2, inducible; immunosuppressive and anti-proliferative                                           |
| HMOX1    | HMOX1             | Heme oxygenase 1, inducible. Reduce T cell priming.                                                                    |
| TNFAIP3  | A20               | Tumor necrosis factor, alpha-induced protein 3, inducible. Promotes tolerance.                                         |
| ACTB     | ACTB              | Endogenous (housekeeping) gene, normalization control                                                                  |
| GAPDH    | GAPDH             | Endogenous (housekeeping) gene, normalization control                                                                  |
| HPRT1    | HPRT1             | Endogenous (housekeeping) gene, normalization control                                                                  |
| GUSB     | GUSB              | Endogenous (housekeeping) gene, normalization control                                                                  |

**ESM Table 4: List of 48 genes analyzed by RT-qPCR in Fluidigm Biomark chips.** Legend: light blue (transcription factors); light orange (beta cell antigens); dark orange (non beta cell antigens); green (secreted inhibitory molecules); red (coinhibitory cell surface ligands or receptors); yellow (tolerance-related enzymes); grey (housekeeping genes).

- Undetected
- Detected in few samples
- Upregulated
- Downregulated
- Not substantially changed

| Gene     | Protein    | FRCs     | DNCs    | LECs    | BECs   | HLA-DR <sup>hi</sup><br>CD45 <sup>lo</sup> |                            |
|----------|------------|----------|---------|---------|--------|--------------------------------------------|----------------------------|
| AIRE     | AIRE       | +        | +       | +       | -      | ↑ 1.15                                     | Transcription regulators   |
| DEAF1    | DEAF1      | ↑ 2.13   | ↑ 1.5   | ↑ 1.7   | ↓ 1.25 | ↑ 1.13                                     |                            |
| FEZF2    | FEZF2      | -        | -       | -       | -      | -                                          |                            |
| INS      | Insulin    | ↑ 8.13   | ↑ 2.13  | ↓ 1.25  | ↑ 2.5  | ↑ 9.0*                                     |                            |
| GAD2     | GAD65      | -        | -       | +       | -      | +                                          | Tissue-restricted antigens |
| PTPRN    | IA-2       | +        | +       | +       | +      | +                                          |                            |
| G6PC2    | IGRP       | -        | -       | -       | -      | -                                          |                            |
| CHGA     | CHGA       | -        | -       | -       | -      | -                                          |                            |
| SLC30A8  | ZNT8       | -        | -       | -       | -      | +                                          |                            |
| ICA1     | ICA1       | ↑ 15.23  | ↓ 1.29  | ↑ 2.22* | ↑ 1.7* | ↑ 5.7                                      |                            |
| IAPP     | IAPP       | -        | -       | +       | -      | +                                          |                            |
| CELA1    | CELA1      | -        | -       | -       | -      | +                                          |                            |
| AMBP     | AMBP       | -        | -       | -       | -      | +                                          |                            |
| SAG      | Arrestin   | -        | -       | -       | -      | -                                          |                            |
| TYR      | Tyrosinase | ↑ 10.77  | +       | +       | +      | +                                          |                            |
| MLANA    | MART1      | ↑ 13.27* | ↑ 7.37  | ↑ 2.91  | ↑ 1.97 | ↑ 1.94                                     | Secreted molecules         |
| TGFB1    | TGF-b1     | ↑ 1.82   | ↑ 1.6   | ↑ 1.58  | ↑ 1.2  | ↓ 1.16                                     |                            |
| IL10     | IL-10      | ↓ 1.05   | ↑ 1.5   | +       | +      | ↓ 2                                        |                            |
| IL27     | IL-27a     | -        | -       | -       | -      | +                                          |                            |
| IL12A    | IL-12p35   | ↑ 4.59*  | ↑ 1.94  | ↑ 1.67  | ↑ 2.89 | ↑ 1.66                                     |                            |
| EBI3     | EBI3       | ↑ 3.68   | ↑ 2.35  | ↑ 2.91  | ↑ 1.39 | ↓ 1.75†                                    |                            |
| IL1RN    | IL-1RA     | ↓ 1.06   | ↑ 1.67  | +       | +      | ↓ 2.22                                     |                            |
| LGALS1   | Galectin-1 | ↑ 2.7    | ↑ 1.66  | ↑ 1.32  | ↑ 1.25 | ↓ 1.47                                     |                            |
| LGALS9   | Galectin-9 | ↑ 5.05   | ↑ 3.33  | ↑ 2.19  | ↑ 1.99 | ↓ 1.58                                     |                            |
| TSLP     | TSLP       | ↓ 1.45   | ↑ 1.76  | ↑ 1.97  | ↑ 1.38 | +                                          |                            |
| ENTPD1   | CD39       | ↑ 1.62   | ↑ 2.2   | ↑ 2.48* | ↑ 1.68 | ↑ 1.4                                      |                            |
| NT5E     | CD73       | ↑ 7.11   | ↑ 2.7   | ↑ 1.03  | ↑ 1.86 | ↓ 1.35                                     |                            |
| CD274    | PD-L1      | ↑ 1.83   | ↑ 1.27  | ↑ 2.07  | ↑ 1.31 | ↓ 1.05                                     |                            |
| PDCD1LG2 | PD-L2      | ↑ 4.22   | ↑ 2.93  | ↑ 2.38  | ↑ 1.44 | ↑ 1.81                                     |                            |
| SMA4A    | Sema4A     | ↑ 1.43   | ↑ 3.24  | ↓ 1.12  | ↑ 9.83 | ↓ 1.26                                     |                            |
| VTCN1    | B7-H4      | ↑ 3.33   | ↑ 3.35  | ↓ 2.17  | ↓ 1.05 | ↑ 2.91                                     | Surface ligands            |
| ICOSLG   | ICOS-L     | ↑ 8.99   | ↑ 1.81  | ↓ 1.03  | ↓ 1.63 | ↓ 1.61                                     |                            |
| TNFRSF14 | HVEM       | ↑ 2.92*  | ↑ 1.37  | ↑ 1.81† | ↑ 1.5  | ↓ 1.16                                     |                            |
| LILRB4   | ILT3       | ↑ 2.02   | ↑ 2.53  | ↑ 1.73  | ↑ 3.4  | ↑ 1.2                                      |                            |
| LILRB2   | ILT4       | ↑ 1.4    | ↑ 2.71  | ↓ 1.58  | ↑ 1.65 | ↓ 1.16                                     |                            |
| FAS      | FAS        | ↑ 2.13   | ↑ 1.88  | ↑ 1.51  | ↑ 1.49 | ↓ 2.3*                                     |                            |
| FASLG    | FASL       | -        | +       | -       | -      | +                                          | Enzymes                    |
| IDO1     | IDO1       | ↑ 1.8    | ↓ 1.15  | ↓ 3.57  | ↑ 3.84 | ↓ 3.45*                                    |                            |
| ALDH1A1  | ALDH1A1    | ↑ 4.5    | ↑ 4.89* | ↑ 1.78  | ↑ 1.79 | ↑ 2.69                                     |                            |
| ARG1     | ARG1       | +        | ↑ 6.12  | +       | +      | +                                          |                            |
| ARG2     | ARG2       | ↑ 2.62   | ↑ 2.4*  | ↑ 1.74† | ↑ 2.48 | ↑ 3.56                                     |                            |
| NOS2     | iNOS       | -        | -       | ↑ 3.68  | -      | +                                          |                            |
| HMOX1    | HMOX1      | ↑ 1.19   | ↑ 1.91  | ↑ 1.26  | ↑ 2.34 | ↓ 2.32                                     |                            |
| TNFAIP3  | A20        | ↓ 1.05   | ↑ 1.68  | ↑ 1.33  | ↑ 1.86 | ↓ 1.44                                     |                            |

Tolerance-related genes

**ESM Table 5. Summary of type 1 diabetes-associated changes in gene expression in LNSCs and HLA-DR<sup>high</sup> CD45<sup>low</sup> cells.** Numbers represent the fold change in gene expression in type 1 diabetes samples relative to control samples (↑ upregulated; ↓ downregulated). Color legend: grey (-), below detection or in less than 20% of the samples; yellow (+), detected only in a fraction of the donors; pink, >2-fold increase OR increase that is significant (\*) or would be if it was not for an outlier (†); blue, >2-fold decrease OR decrease that is significant (\*) or would be if it was not for an outlier (†); white, no meaningful change in expression.

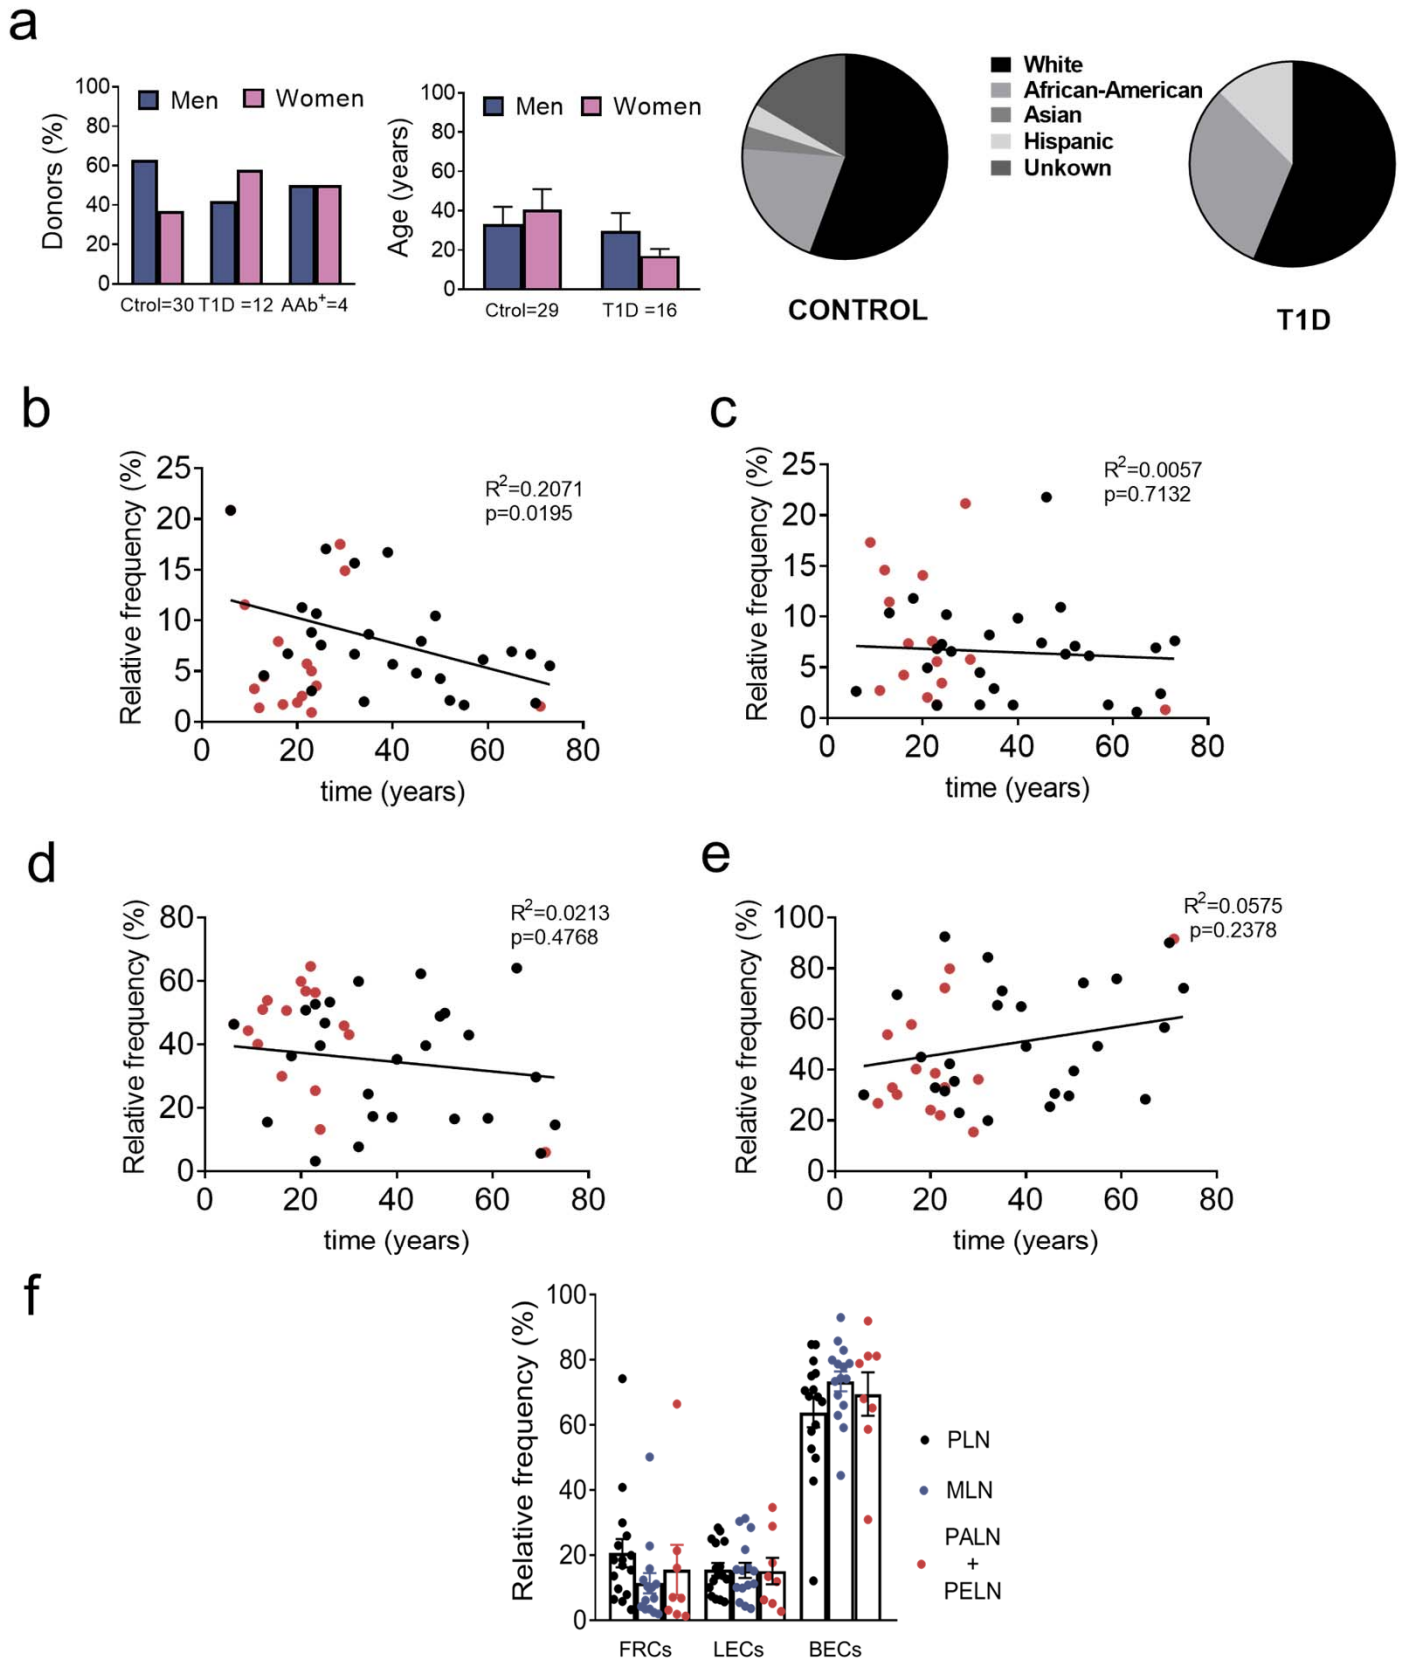

**ESM Fig.1. Donor demographics and LNSC subset distribution in human samples.** (a) Percentage of men and women, age distribution and ethnicity in control and type 1 diabetes (T1D) donors. (b-e) Distribution of the relative frequencies of LNSCs, FRCs (b), LECs (c), BECs (d) and DNCs (e) in control and T1D human PLNs over the years. (f) Comparison of the relative frequency of FRCs, LECs and BECs between PLNs, mesenteric (MLNs) and para-aortic (PALN) and peri-esophagic (PELNs) LNs from control donors.

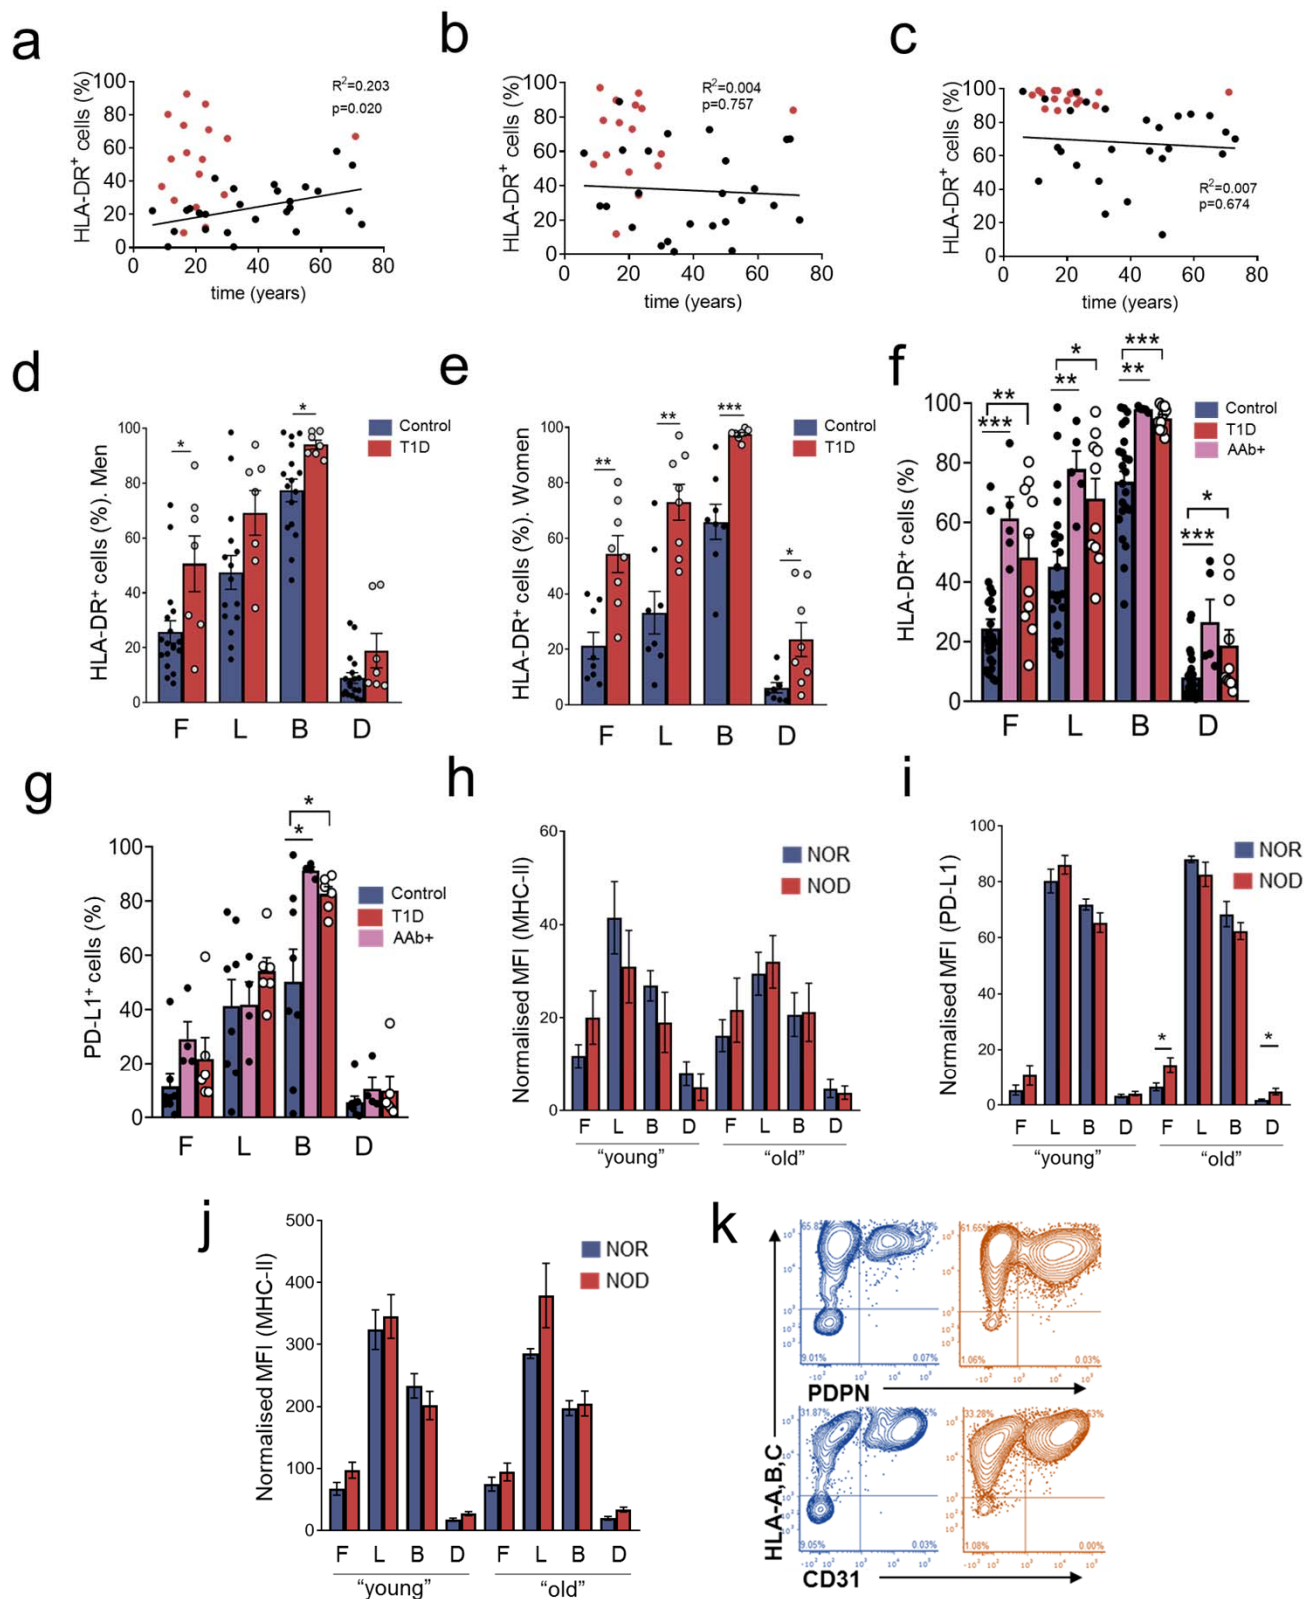

**ESM Fig.2. MHC-II, PD-L1 and MHC-I expression in human and mouse LNSCs.** (a-c) Distribution of the percentage of HLA-DR<sup>+</sup> cells among FRCs (a), LECs (b) and BECs (c) in control (black) and type 1 diabetes (T1D) (red) PLNs over the years. (d-e) Percentage of HLA-DR<sup>+</sup> cells in LNSC subsets in men (d) and women (e) from control and T1D donors. (f,g) Percentage of HLA-DR<sup>+</sup> (f) and PD-L1<sup>+</sup> (g) cells in LNSC subsets from the PLNs of control, AAb<sup>+</sup> and T1D donors. (h-j) Normalized MFI of MHC-II (h), PD-L1 (i) and MHC-I (j) on LNSC subsets in PLNs from NOR and NOD mice from two age groups. (k) Representative dot plots of HLA-A,B,C expression vs PDPN and CD31 in CD45<sup>-</sup> cells from control (blue) and T1D (red) PLNs. Abbreviations: F, FRCs; L, LECs; B, BECs; D, DNCs.



a

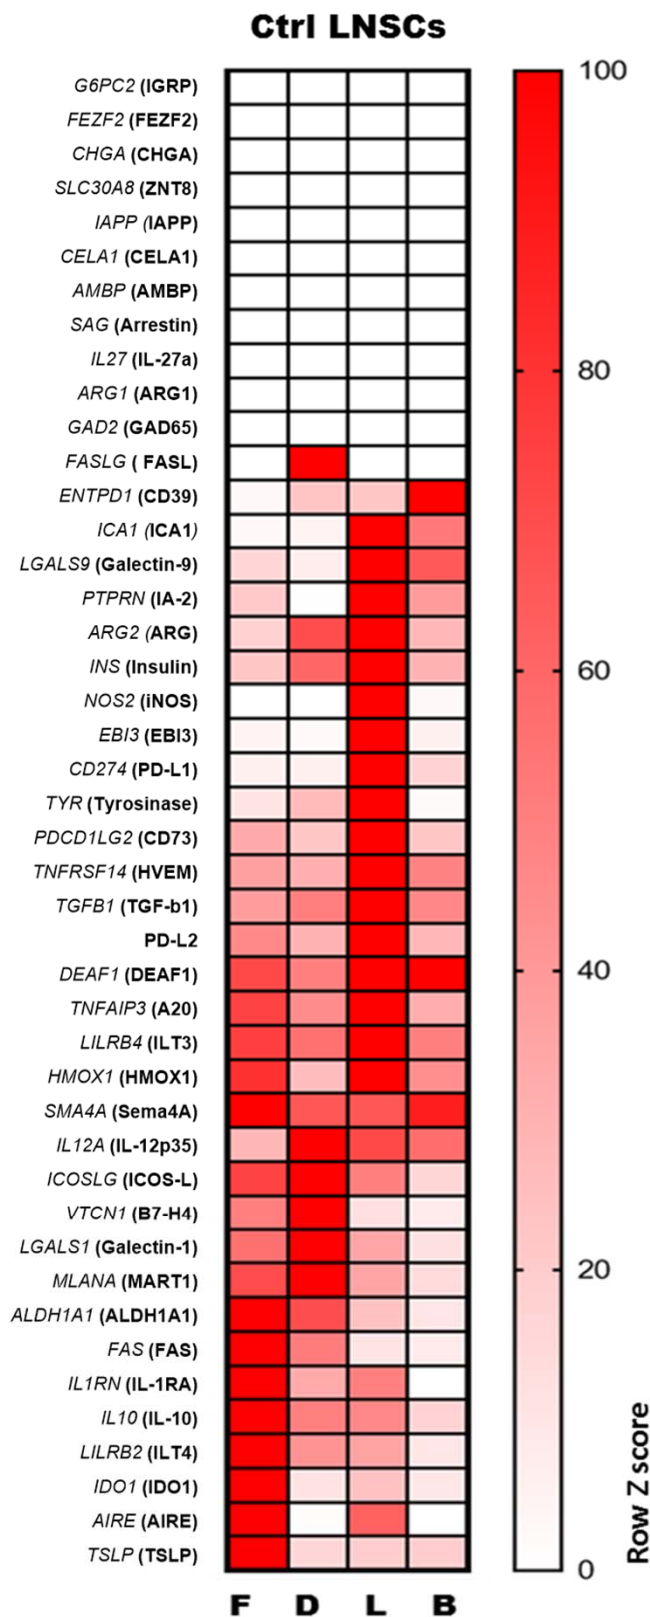

b

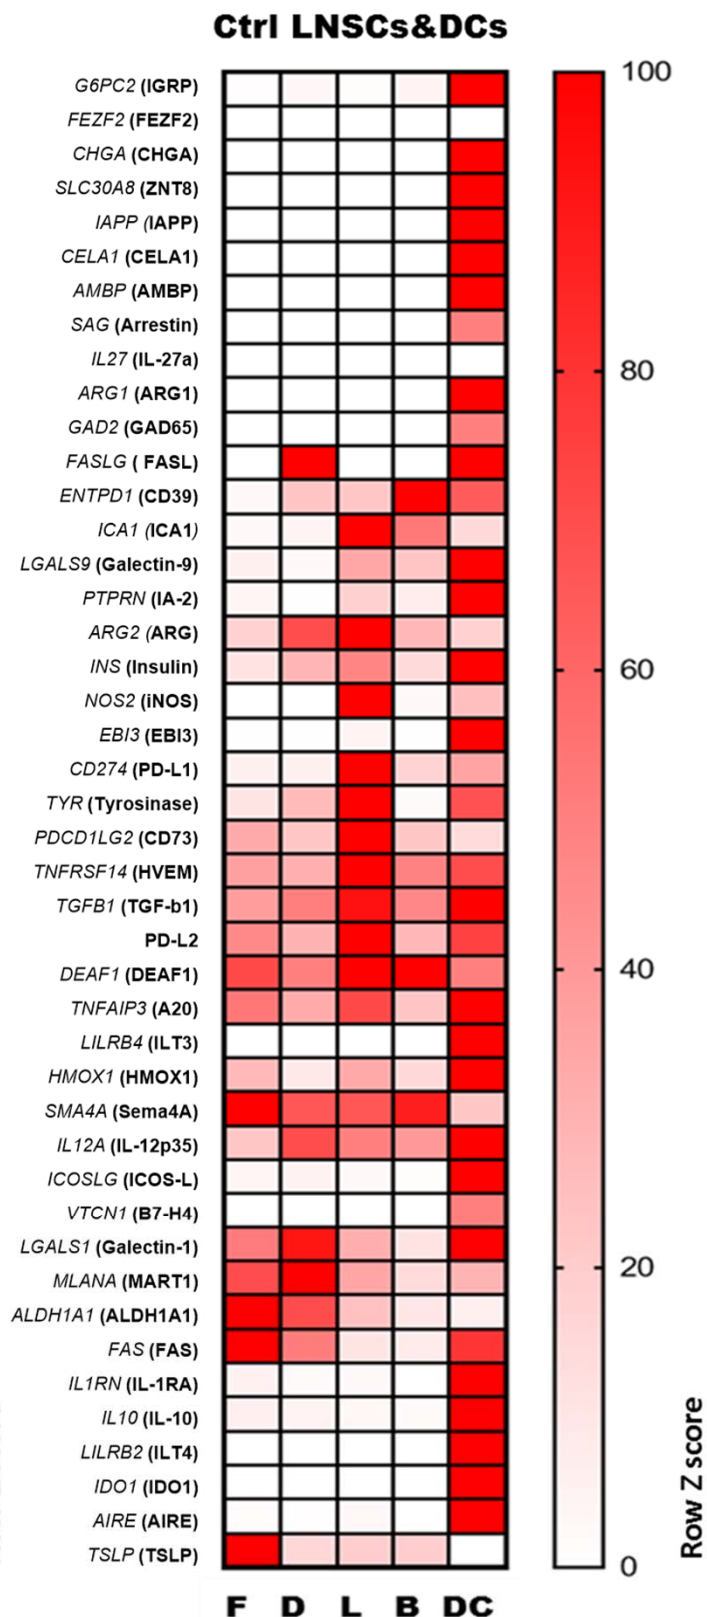

**ESM Fig.3. Gene expression comparison between human LNSCs and AIRE-enriched dendritic cells (DC).** (a) Fold change expression of selected genes among the four subsets of LNSCs in PLNs from human control donors, normalized to 100% based on the subset with the maximal expression for each individual gene (row Z score), based on quantitative PCR data. (b) Fold change expression of the same genes (same normalization as in a) with sorted CD45<sup>low</sup> HLA-DR<sup>high</sup> cells included in the analysis for comparison. Abbreviations: F, FRCs; D, DNCs; L, LECS; B, BECs; DC, CD45<sup>low</sup> HLA-DR<sup>high</sup>.

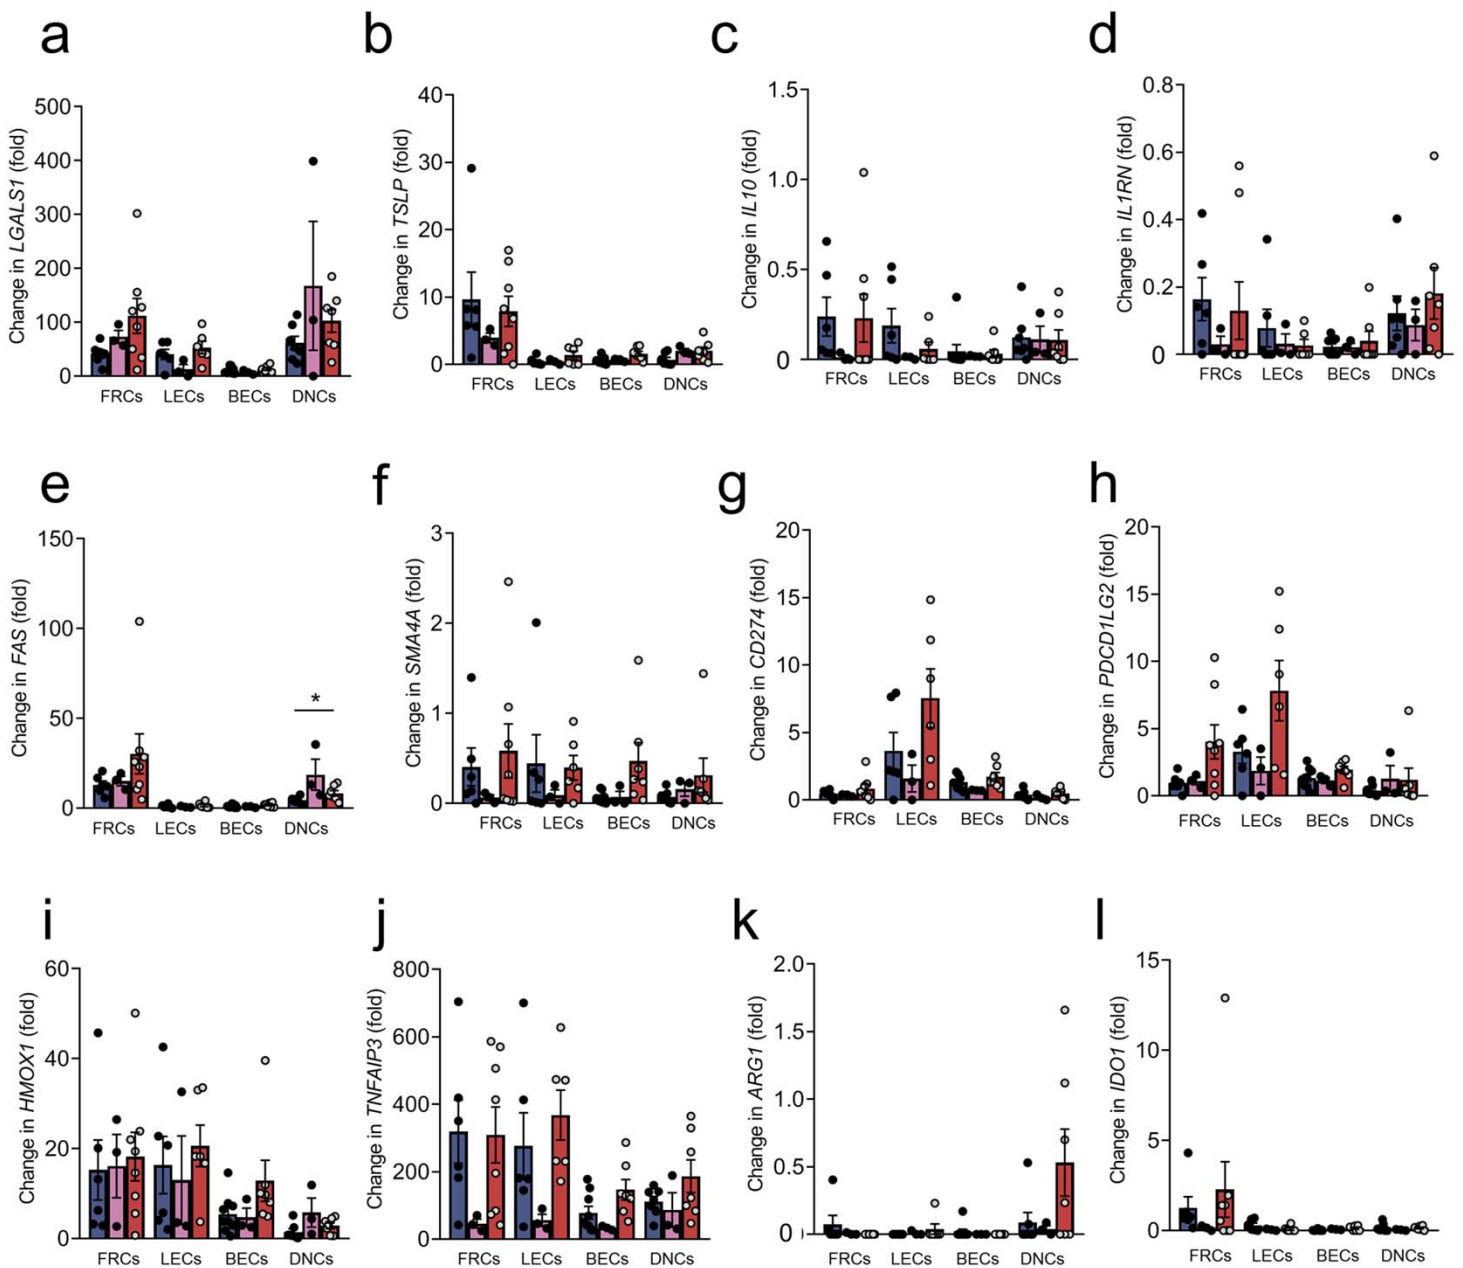

**ESM Fig.4. Type 1 diabetes-associated changes in gene expression in human LNSC subsets.** Relative mRNA expression by quantitative PCR in human LNSC subsets between control (black), AAb<sup>+</sup> (blue) and type 1 diabetes (T1D) (red) donors for: (a,b,c,d) secreted molecules; (e,f,g,h) cell surface ligands and (i,j,k,l) immunosuppressive enzymes. All mRNA levels are normalized against the endogenous control *HPRT1*.
